# Supplementary material for: Cost of Inpatient Falls and Cost-Benefit Analysis of Implementation of an Evidence-Based Fall Prevention Program
Source: PubMed Central journal article supplement (PMC9860521; doi:10.1001/jamahealthforum.2022.5125), 2023-01-20
Supplement: jamahealthforum-e225125-s002.pdf [file jamahealthforum-e225125-s002.pdf]

## Data Sharing Statement

Dykes. Cost of Inpatient Falls and Cost-Benefit Analysis of Implementation of an Evidence-based Fall Prevention Program. *JAMA Health Forum*. Published January 20, 2023.  
doi:10.1001/jamahealthforum.2022.5125

### Data

**Data available:** No
